# Supplementary material
Source: PubMed Central journal article supplement (PMC3475325)
Supplement: NIHMS404739-supplement-02.pdf [file NIHMS404739-supplement-02.pdf]

# **Sensation in a single neuron pair represses male behavior in hermaphrodites**

Jamie Q. White and Erik M. Jorgensen

## **Supplemental information inventory**

Tables 1, 2, 3 and 4 - supports Results and Experimental Procedures

Figures 1 and 2 - supports Results

Supplemental Experimental Procedures - supports Supplemental Figure 2

## Supplemental Table 1: Strains

| Strain number                        | Genotype                                                                                                                                              | Source               | Notes                                                                                         |
|--------------------------------------|-------------------------------------------------------------------------------------------------------------------------------------------------------|----------------------|-----------------------------------------------------------------------------------------------|
| N2 Bristol                           | wild-type                                                                                                                                             | CGC                  | Laboratory reference strain.                                                                  |
| EG2717                               | <i>him-5(e1490) V</i>                                                                                                                                 | (White et al., 2011) | 8x outcrossed against N2 Bristol.                                                             |
| EG2718                               | <i>him-8(e1489) IV</i>                                                                                                                                | (White et al., 2011) | 8x outcrossed against N2 Bristol.                                                             |
| CB1372                               | <i>daf-7(e1372ts) III</i>                                                                                                                             | CGC                  | Reference allele.                                                                             |
| EG3702                               | <i>daf-7(e1372ts) III ; him-5(e1490) V</i>                                                                                                            | Thomas J. Nicholas   | For checking male behavior in <i>daf-7</i> background. Outcrossed <i>daf-7</i> mutant strain. |
| PY3769                               | <i>daf-7(e1372ts) III ; oyls14[Psra-6::gfp] V ; daf-12(rh61rh411) X</i>                                                                               | Piali Sengupta       | <i>Psra-6::GFP</i> off in ASI and ASH; <i>daf-d</i> . Independent <i>daf-7</i> mutant strain. |
| PY1671                               | <i>daf-7(e1372ts) III ; oyls14[Psra-6::gfp] V ; daf-3(mgDf90) X</i>                                                                                   | Piali Sengupta       | GFP in ASH, ASI, PVQ, <i>daf-d</i> .                                                          |
| CB1376                               | <i>daf-3(e1376) X</i>                                                                                                                                 | CGC                  | <i>daf-3</i> suppresses <i>daf-7</i>                                                          |
| EG6125<br>EG6126<br>EG6127           | <i>daf-7(e1372ts) III ; him-5(e1490) V ; oxEx1478[Podr-4::egfp_daf-7::unc-54UTR, Punc-17::mCherry]</i>                                                | This study           | Rescue of <i>daf-7</i> in most sensory neurons (includes ASI).                                |
| EG6169<br>EG6170                     | <i>daf-7(e1372ts) III ; him-5(e1490) V ; oxEx1484[Punc-17::mCherry, Ppkd-2::gfp]</i>                                                                  | This study           | Made to check for male neurons in <i>daf-7</i> hermaphrodites.                                |
| EG6254<br>EG6255<br>EG6256           | <i>daf-7(e1372ts) III ; him-5(e1490) V ; oxEx1496[Pceh-36::egfp_daf-7, Punc-17::mCherry]</i>                                                          | This study           | <i>daf-7</i> rescue in AWC/ASE.                                                               |
| EG6289<br>EG6290                     | <i>daf-7(e1372ts) III ; him-5(e1490) V ; oyls48[P(ceh-36)::gfp, lin-15(+)] V</i>                                                                      | This study           | For ablations in a <i>daf-7</i> background.                                                   |
| PR678                                | <i>tax-4(p678) III</i>                                                                                                                                | CGC                  | Reference allele. <i>p678</i> allele verified by sequencing                                   |
| EG3701                               | <i>tax-4(p678) III ; lin-15(n765ts) X</i>                                                                                                             | (White et al., 2011) | <i>p678</i> allele confirmed by sequencing.                                                   |
| EG5487<br>EG5488<br>EG5489           | <i>tax-4(p678) III ; lin-15(n765ts) X ; oxEx1376[Pgpa-4::tax-4_gfp(S65C), ccGFP, lin-15(+)]</i>                                                       | This study           | <i>tax-4</i> rescue in ASI.                                                                   |
| EG5457<br>EG5459<br>EG5482           | <i>tax-4(p678) III ; lin-15(n765ts) X ; oxEx1374[Psrg-2::tax-4_gfp(S65C), ccGFP, lin-15(+)]</i>                                                       | This study           | <i>tax-4</i> rescue in ASK.                                                                   |
| EG5671<br>EG5672<br>EG5673           | <i>tax-4(p678) III ; lin-15(n765ts) X ; oxEx1379[Pgpa-9::tax-4_gfp(S65C), ccGFP, lin-15(+)]</i>                                                       | This study           | <i>tax-4</i> rescue in ASJ.                                                                   |
| EG5358<br>EG5359<br>EG5360<br>EG5361 | <i>him-5(e1490) V ; lin-15(n765ts) X ; oxEx1299[Prab-3::&gt;mCherry::let-858&gt;::egfp_fem-3::unc-54UTR, Phsp-FLP, Ppkd-2::gfp(venus), lin-15(+)]</i> | This study           | Heat-shock FLP-ON to masculinize the nervous system.                                          |
| EG6167<br>EG6168                     | <i>him-8(e1489) IV ; lin-15(n765ts) X ; oxEx1482[Podr-4::tra-2ic::mCherry, lin-15(+)]</i>                                                             | This study           | <i>Podr-4</i> neurons are red (mCherry) and feminized ( <i>tra-2ic</i> ).                     |
| EG4168                               | <i>him-8(e1489) IV ; oyls48[P(ceh-36)::gfp, lin-15(+)] V</i>                                                                                          | (White et al., 2011) | Green AWC and ASE neurons. Routinely used for ablations.                                      |

**Supplemental Table 2: Promoters used for sensory neuron and pan-neural expression**

|                                    | <b>Promotor</b>    |                     |                      |                      |                      |                    |
|------------------------------------|--------------------|---------------------|----------------------|----------------------|----------------------|--------------------|
|                                    | <b>Podr-4</b>      | <b>Pgpa-4</b>       | <b>Psrg-2</b>        | <b>Psrg-8</b>        | <b>Pceh-36</b>       | <b>Prab-3</b>      |
| <b>Reference</b>                   | Dwyer et al., 1998 | Jansen et al., 1999 | Troemel et al., 1995 | Troemel et al., 1995 | Lanjuin et al., 2003 | Nonet et al., 1997 |
| <b>Class</b>                       | Sensory            | Sensory             | Sensory              | Sensory              | Sensory              | Pan-neural         |
| <b>Reported expression pattern</b> | AWA                |                     |                      |                      |                      | All neurons        |
|                                    | AWB                |                     |                      |                      |                      |                    |
|                                    | AWC                |                     |                      |                      | AWC<br>ASE           |                    |
|                                    | ASG                |                     |                      |                      |                      |                    |
|                                    | ASI                | ASI                 |                      |                      |                      |                    |
|                                    | ASJ                |                     |                      |                      |                      |                    |
|                                    | ASK                |                     |                      | ASK                  | ASK                  |                    |
|                                    | ADF                |                     |                      |                      |                      |                    |
|                                    | ADL                |                     |                      |                      |                      |                    |
|                                    | ASH                |                     |                      |                      |                      |                    |
|                                    | PHA                |                     |                      |                      |                      |                    |
|                                    | PHB                |                     |                      |                      |                      |                    |

**Supplemental Table 3: Reported expression patterns of *Pglr-2*, *Pglr-5*, and *Pser-2b***

| <b><i>Pglr-2</i> +</b> |                                  |                                  |                                   |                                                                                                    |
|------------------------|----------------------------------|----------------------------------|-----------------------------------|----------------------------------------------------------------------------------------------------|
| <b><i>Pglr-5</i> +</b> |                                  |                                  |                                   |                                                                                                    |
| <b><i>Pser-2b</i></b>  | <b><i>Pglr-2</i><sup>a</sup></b> | <b><i>Pglr-5</i><sup>a</sup></b> | <b><i>Pser-2b</i><sup>b</sup></b> | <b>Notes based on hermaphrodite wiring<sup>c</sup></b>                                             |
| AIA                    | AIA                              |                                  |                                   | Ring interneuron.                                                                                  |
| AIB                    | AIB                              | AIB?                             |                                   | Amphid sensory neuron. generally responds to aversive signals.                                     |
| AIY                    |                                  |                                  | AIY                               | Amphid interneuron. Functions in thermosensation.                                                  |
| AIZ                    |                                  |                                  | AIZ                               | Amphid interneuron. Functions in thermosensation                                                   |
| AVA                    | AVA                              | AVA                              |                                   | Command interneuron. Drives backward movement in the locomotory circuit.                           |
| AVB                    |                                  | AVB                              |                                   | Command interneuron. Drives forward movement in the locomotory circuit.                            |
| AVD                    | AVD                              | AVD                              |                                   | Command interneuron. Drives backward movement in the locomotory circuit.                           |
| AVE                    | AVE                              | AVE                              |                                   | Command interneuron. Drives backward movement in the locomotory circuit.                           |
| AVG                    | AVG                              |                                  |                                   | Ventral cord interneuron. Pioneers the right tract of the ventral cord.                            |
| AVK                    |                                  | AVK                              |                                   | Ring and ventral cord interneuron.                                                                 |
| BDU                    |                                  |                                  | BDU                               | Interneuron, process runs along excretory canal and then into NR via the deirid commissures.       |
| DVA                    | DVA                              | DVA?                             | DVA                               | Ring interneuron. Functions in mechanosensory integration; sets the activity of the touch circuit. |
| HSN?                   |                                  | HSN?                             |                                   | Hermaphrodite-specific motor neuron. Die in male embryos.                                          |
| LUA                    |                                  | LUA                              |                                   | Interneuron. Possible connector between PLM touch neurons.                                         |
| M1                     | M1                               |                                  |                                   | Pharangeal motor neuron.                                                                           |
| PVC                    | PVC                              | PVC?                             |                                   | Tail interneuron.                                                                                  |
| PVQ                    |                                  | PVQ                              |                                   | Tail interneuron. Pioneers the left tract of the ventral cord.                                     |
| PVT +/-                |                                  |                                  | PVT +/-                           | Tail interneuron. Projects to ring. Different connectivity in males and hermaphrodites.            |
| RIA                    | RIA                              |                                  |                                   | Ring interneuron.                                                                                  |
| RIC                    |                                  | RIC                              |                                   | Ring interneuron. Expresses octopamine.                                                            |
| RID                    |                                  |                                  | RID                               | Ring motorneuron.                                                                                  |
| RIF                    |                                  | RIF                              |                                   | Ring interneuron.                                                                                  |
| RIG                    | RIG                              |                                  |                                   | Ring interneuron.                                                                                  |
| RIM                    |                                  | RIM                              |                                   | Head motorneuron.                                                                                  |
| RIR                    | RIR                              |                                  |                                   | Ring interneuron. Single cell body.                                                                |
| RMDD                   | RMDD                             | RMDD                             |                                   | Motor neuron.                                                                                      |
| RMDV                   | RMDV                             | RMDV                             |                                   | Motor neuron.                                                                                      |
| RME                    |                                  | RME (all)                        | RME                               | Motor neuron.                                                                                      |
| RMG                    |                                  | RMG                              |                                   | Head motorneuron.                                                                                  |
| SABD                   |                                  | SABD                             |                                   | Motor neuron.                                                                                      |
| SABVL                  |                                  | SABVL                            |                                   | Motor neuron.                                                                                      |
| SABVR                  |                                  | SABVR                            |                                   | Motor neuron.                                                                                      |
| SIAD                   |                                  |                                  | SIAD                              | Motor or interneuron.                                                                              |
| SIAV                   |                                  |                                  | SIAV                              | Motor or interneuron.                                                                              |
| SIB (all)              |                                  | SIB (all)                        |                                   | Motor or interneuron.                                                                              |
| SMD (all)              |                                  | SMD (all)                        |                                   | Motor neuron.                                                                                      |
| URA?                   |                                  | URA?                             |                                   | Head motor neurons. Possibly sensory.                                                              |
| URB                    |                                  | URB                              |                                   | Head motor neurons. Possibly sensory.                                                              |
| URY                    |                                  | URY                              |                                   | Head sensory neuron.                                                                               |
| VC                     |                                  | VC                               |                                   | Hermaphrodite specific ventral cord motor neurons.                                                 |

<sup>a</sup> Brockie et al., 2001; Greer et al., 2008

<sup>b</sup> Tsalik and Hobert, 2003; Greer et al., 2008

<sup>c</sup> Taken from WormAtlas ([www.wormatlas.org](http://www.wormatlas.org)) and Sulston and Horvitz, 1977; White et al., 1986.

**Supplemental Table 4: Reported expression pattern of *Punc-17***

| <b><i>Punc-17</i><sup>a,b</sup></b> | <b>Notes based on hermaphrodite wiring<sup>c</sup></b>    |
|-------------------------------------|-----------------------------------------------------------|
| AIY                                 | Amphid interneuron. Functions in thermosensation.         |
| ALN                                 | Tail neuron of unknown function.                          |
| AS.1-11                             | Ventral cord motor neuron.                                |
| DA                                  | Dorsal A motor neuron.                                    |
| DB                                  | Dorsal B motor neuron.                                    |
| HSN                                 | Hermaphrodite-specific motor neuron. Die in male embryos. |
| I1                                  | Pharyngeal interneuron.                                   |
| I6                                  | Pharyngeal interneuron.                                   |
| IL2                                 | Inner labial sensory neuron.                              |
| M1                                  | Pharyngeal motor neuron.                                  |
| M2                                  | Pharyngeal neuron. Unknown/redundant function.            |
| M5                                  | Pharyngeal neuron. Unknown/redundant function.            |
| PLN                                 | Posterior neuron. Unknown function.                       |
| RMD                                 | Motor neuron.                                             |
| SAA                                 | Interneuron, possible stretch receptor neuron.            |
| SAB                                 | Motor neuron.                                             |
| SDQ                                 | Interneuron.                                              |
| SIAD                                | Motor or interneuron.                                     |
| SIAV                                | Motor or interneuron.                                     |
| SIB                                 | Motor or interneuron.                                     |
| SMB                                 | Motor neuron.                                             |
| SMD                                 | Motor neuron.                                             |
| URA                                 | Head motor neurons. Possibly sensory.                     |
| URB                                 | Head motor neurons. Possibly sensory.                     |
| VA                                  | Ventral motor neuron.                                     |
| VB                                  | Ventral motor neuron.                                     |
| VC                                  | Hermaphrodite specific ventral cord motor neurons.        |
| Others <sup>a</sup>                 |                                                           |

<sup>a</sup>Alfonso et al., 1993

<sup>b</sup>The *Punc-17* expression pattern is based on antibody staining and not completely characterized.

<sup>c</sup>Taken from WormAtlas ([www.wormatlas.org](http://www.wormatlas.org)) and references (Sulston and Horvitz, 1977; White et al., 1986).

## Supplemental Figure Legends

**Supplemental Figure 1:** Sex pheromones elicit behavior in *daf-7* mutant hermaphrodites that is similar to males, but not wild-type hermaphrodites. Quantitation of sexual attraction behavior in wild-type males, wild-type hermaphrodites, and *daf-7* mutant hermaphrodites. Wild-type hermaphrodites and males were assayed in the absence and presence of sex pheromone, and *daf-7* mutant males and hermaphrodites were tested in the presence of sex pheromone blind for genotype and pheromone *vs.* control as described in the Experimental Procedures. Comparisons use Fisher's exact test with Bonferroni-Holm correction for multiple comparisons. P values for each comparison are given in the Figure. Data shown are from *daf-7* mutant strain CB1372; similar results were obtained from two other independent strains.

**Supplemental Figure 2:** Sexual attraction in males requires the core sensory neurons AWA, AWC, and ASK, which compensate for one another. Laser ablation of each pair (one pair at a time) in L4 larvae shows that the AWA, AWC, and ASK pairs of sensory neurons are required for adult sexual attraction. Ablation of the ASK neurons in L3 larva results in males with unimpaired sexual attraction. The different outcome of ASK ablation depending on developmental stage (L3 *vs.* L4 larvae) is indicative of compensation, as observed previously for AWA and AWC (White et al., 2007). Ablation of the ASI neurons in L4 larvae shows that they are not required; elimination of the ASI neurons in L4 males may in fact increase the frequency of adult male sexual attraction. Ablations were performed and scored as described (White et al., 2007).

## Supplemental Experimental Procedures

**Behavior.** Assays were at 20-22°C on 50mm nematode growth-media (NGM) agar plates with a 20µl spot of hermaphrodite-conditioned media (pheromone) and a 20µl control spot of unconditioned media (White et al., 2007). All assays were in the presence of a thin layer of HB101 bacteria for the worm to eat. Unless otherwise noted, assays were of single animals. Assays were scored three independent times over a three hour period and once again after 16 hours for a total of four assessments. Assays were classified categorically as either showing attraction behavior or not based on track patterns; an assay needed to show robust attraction track patterns at least twice during the four blind scorings to classify as showing attraction. Each set of assays was repeated on at least three different days, and contained positive and negative controls in numbers approximately equal to the conditions being tested.

Male sexual attraction in the Supplemental Figure, panel A was scored numerically as in previous work (White et al., 2007), rather than categorically. Assays were of single males. Operated or mock-ablated males were scored 3 independent times, scores for the indicated number of assays were averaged; error bars in the figures show the average standard error of the mean.

## Supplemental References

- Alfonso, A., Grundahl, K., Duerr, J.S., Han, H.P., and Rand, J.B. (1993). The *Caenorhabditis elegans unc-17* gene: a putative vesicular acetylcholine transporter. *Science* 261, 617-619.
- Brockie, P.J., Madsen, D.M., Zheng, Y., Mellem, J., and Maricq, A.V. (2001). Differential expression of glutamate receptor subunits in the nervous system of *Caenorhabditis elegans* and their regulation by the homeodomain protein UNC-42. *J. Neurosci.* 21, 1510-1522.
- Dwyer, N.D., Troemel, E.R., Sengupta, P., and Bargmann, C.I. (1998). Odorant receptor localization to olfactory cilia is mediated by ODR-4, a novel membrane-associated protein. *Cell* 93, 455-466.
- Jansen, G., Thijssen, K.L., Werner, P., van der Horst, M., Hazendonk, E., and Plasterk, R.H. (1999). The complete family of genes encoding G proteins of *Caenorhabditis elegans*. *Nat. Genet.* 21, 414-419.
- Lanjuin, A., VanHoven, M.K., Bargmann, C.I., Thompson, J.K., and Sengupta, P. (2003). Otx/otd homeobox genes specify distinct sensory neuron identities in *C. elegans*. *Dev. Cell* 5, 621-633.
- Nonet, M.L., Staunton, J.E., Kilgard, M.P., Fergestad, T., Hartweg, E., Horvitz, H.R., Jorgensen, E.M., and Meyer, B.J. (1997). *Caenorhabditis elegans rab-3* mutant synapses exhibit impaired function and are partially depleted of vesicles. *J. Neurosci.* 17, 8061-8073.
- Troemel, E.R., Chou, J.H., Dwyer, N.D., Colbert, H.A., and Bargmann, C.I. (1995). Divergent seven transmembrane receptors are candidate chemosensory receptors in *C. elegans*. *Cell* 83, 207-218.
- Tsalik, E.L., and Hobert, O. (2003). Functional mapping of neurons that control locomotory behavior in *Caenorhabditis elegans*. *J. Neurobiol.* 56, 178-197.
